# Supplementary material for: MoS2 nanosheet/Mo2C-embedded N-doped carbon nanotubes: synthesis and electrocatalytic hydrogen evolution performance
Source: Royal Society of Chemistry journal article supplement (doi:10.1039/c4ta04564e), 2014-01-01
Supplement: c4ta04564e1.pdf [file c4ta04564e1.pdf]

## Electronic Supplementary Information

### **MoS<sub>2</sub> nanosheet/Mo<sub>2</sub>C-embedded N-doped carbon nanotubes: Synthesis and electrocatalytic hydrogen evolution performance**

**Kai Zhang,<sup>a</sup> Yang Zhao,<sup>a</sup> Shen Zhang, Hailong Yu,<sup>a</sup> Yujin Chen,<sup>\*a</sup> Peng Gao,<sup>\*b</sup> and Chunling Zhu<sup>\*b</sup>**

<sup>a</sup> *Key Laboratory of In-Fiber Integrated Optics, Ministry of Education, and College of Science, Harbin Engineering University, Harbin 150001, China. E-mail: chen yujin@hrbeu.edu.cn*

<sup>b</sup> *College of Materials Science and Chemical Engineering, Harbin Engineering University, Harbin, 150001, China. E-mail: gaopeng@hrbeu.edu.cn, and zhuchunling@hrbeu.edu.cn*

## **Experimental sections**

### **Fabrication of MoO<sub>3</sub>/PANI hybrids**

0.15 g of  $\alpha$ -MoO<sub>3</sub> nanorods was dispersed in 100 mL of 1 mol L<sup>-1</sup> HCl solution by sonication treatment and then the mixture was cooled down to 0 °C under stirring. 0.2 mL of aniline was dissolved in 100 mL of 1 mol L<sup>-1</sup> HCl solution, and then transferred to the solution of ammonium persulfate (0.25 g) dissolved in 100 mL of 1 mol L<sup>-1</sup> HCl solution in the beaker. The mixture solution above was cooled down to 0 °C, then transferred to the suspension and kept at the temperature for 4 h under stirring. The precipitate was washed by distilled water and ethanol, and then dried at 40 °C for 24 h.

### **Fabrication of MoO<sub>2</sub>/Mo<sub>2</sub>C-NCNTs**

After the MoO<sub>3</sub>/PANI hybrids were thermally treated at 700°C for 2 h at Ar gas flow, the MoO<sub>2</sub>/Mo<sub>2</sub>C-NCNTs were obtained.

### **Fabrication of MoS<sub>2</sub>/Mo<sub>2</sub>C-NCNTs**

50 mg of the as-obtained MoO<sub>2</sub>/Mo<sub>2</sub>C-NCNTs was dispersed in 30 mL of 0.15 mol L<sup>-1</sup> thiourea solution. The mixture was sonicated for 10 min and stirred for 30 min at room temperature, and then was transferred to a 50 mL Teflon-lined stainless steel autoclave and treated in an oven at 200 °C for 48 h. The resulting precipitate was collected and washed by deionized water and ethanol, and then dried at 40 °C for 24 h.

### **Fabrication of MoS<sub>2</sub> nanoflowers**

50 mg of  $\alpha$ -MoO<sub>3</sub> nanorods was dispersed in 30 mL of 0.15 mol L<sup>-1</sup> thiourea solution. The mixture was sonicated for 10 min and stirred for 30 min at room temperature, and then was transferred to a 50 mL Teflon-lined stainless steel autoclave and treated in an oven at 200 °C for 48 h. The resulting precipitate was collected and washed by deionized water and ethanol, and then dried at 40 °C for 24 h.

## **Structural Characterization**

The morphology and size of the synthesized 3D architectures were characterized by

scanning electron microscope [HSD/SU70] and an FEI Tecnai-F20 transmission electron microscope equipped with a Gatan imaging filter (GIF). The crystal structure of the sample was determined by X-ray diffraction (XRD) [D/max 2550 V, Cu K $\alpha$  radiation]. XPS measurements were carried out using a spectrometer with Al K $\alpha$  radiation (K-Alpha, Thermo Fisher Scientific Co.). The binding energy was calibrated with the C 1s position of contaminant carbon in the vacuum chamber of the XPS instrument (284.8 eV).

## **Electrochemical measurements**

Electrochemical measurements were performed in a three-electrode system at an electrochemical station (CHI660D). The three-electrode configuration using an Ag/AgCl (KCl saturated) electrode as the reference electrode, a graphite rod as the counter electrode, and the carbon paper coated with catalyst was used as the working electrode. The working electrode was fabricated as follows: the catalyst was dispersed in N-methyl-2-pyrrolidone (NMP) solvent containing 7.5 wt% polyvinylidene fluoride (PVDF) under sonication, in which the weight ratio of the catalyst to PVDF is 8:1. Then the slurry was coated onto a piece of carbon paper (length $\times$ diameter $\times$ thickness = 6 cm $\times$ 1 cm $\times$ 0.03 cm). The loading density of the catalyst was  $\sim 2$  mg cm $^{-2}$ . Linear sweep voltammetry with scan rate of 5 mV s $^{-1}$  was conducted in 0.5 M H $_2$ SO $_4$  (deaerated by N $_2$ ). For a Tafel plot, the linear portion is fit to the Tafel equation. All data have been corrected for a small ohmic drop based on impedance spectroscopy. In 0.5 M H $_2$ SO $_4$ ,  $E_{(\text{RHE})} = E_{(\text{SCE})} + 0.21$  V. All the potentials reported in our manuscript were calibrated to a reversible hydrogen electrode (RHE).

**Table S1.** Comparisons of HER performances among different MoS<sub>2</sub> and Mo<sub>2</sub>C-based catalysts

| Catalyst type                             | Loading density [mg cm <sup>-2</sup> ] | Tafel slope [mV dec <sup>-1</sup> ] | Exchange current $j_0$ [ $\mu$ A cm <sup>-2</sup> ] | $j$ [mA cm <sup>-2</sup> ] at $\eta=150$ mV | $j$ [mA cm <sup>-2</sup> ] at $\eta=200$ mV | $j$ [mA cm <sup>-2</sup> ] at $\eta=300$ mV | Refs      |
|-------------------------------------------|----------------------------------------|-------------------------------------|-----------------------------------------------------|---------------------------------------------|---------------------------------------------|---------------------------------------------|-----------|
| Double-gyroid MoS <sub>2</sub>            | $0.06 \times 10^{-3}$                  | 50                                  | —                                                   | 1                                           | 4                                           | —                                           | 3 b)      |
| Oxygen-Incorporated MoS <sub>2</sub>      | 0.285                                  | 55                                  | 12.6                                                | 4                                           | 19                                          | 127                                         | 3 g)      |
| Rich-defect MoS <sub>2</sub>              | 0.285                                  | 50                                  | 9                                                   | 0                                           | 13                                          | 70                                          | 3 f)      |
| MoS <sub>2</sub> /3D Graphene             | 5                                      | 43                                  | —                                                   | 13                                          | 42                                          | 140                                         | 6 a)      |
| Mo <sub>2</sub> C/CNT                     | 2.0                                    | 55.2                                | 14                                                  | 9.8                                         | —                                           | —                                           | 12        |
| Mo <sub>2</sub> C/XC                      | 2.0                                    | 59.4                                | 8.1                                                 | 3.2                                         | ~7                                          | —                                           | 12        |
| Mo <sub>2</sub> C/NWs                     | 0.357                                  | 55.8                                | —                                                   | ~1.5                                        | 10.2                                        | ~65                                         | 13        |
| Mo <sub>2</sub> C/NSs                     | 0.357                                  | 64.5                                | —                                                   | ~1                                          | 5.3                                         | ~30                                         | 13        |
| Mo <sub>2</sub> C                         | 0.8                                    | 54                                  | 3.8                                                 | 2                                           | 14                                          | —                                           | 7 a)      |
| MoS <sub>2</sub> /Mo <sub>2</sub> C-NCNTs | 2.0                                    | 69                                  | 21                                                  | 5.7                                         | 15.4                                        | 280                                         | This work |
| Bulk MoS <sub>2</sub>                     | 2.0                                    | 120                                 | —                                                   | 1.4                                         | 3                                           | 21                                          | This work |
| MoS <sub>2</sub> nanoflowers              | 3.0                                    | 113                                 | —                                                   | 10.7                                        | 16.9                                        | 123                                         | This work |

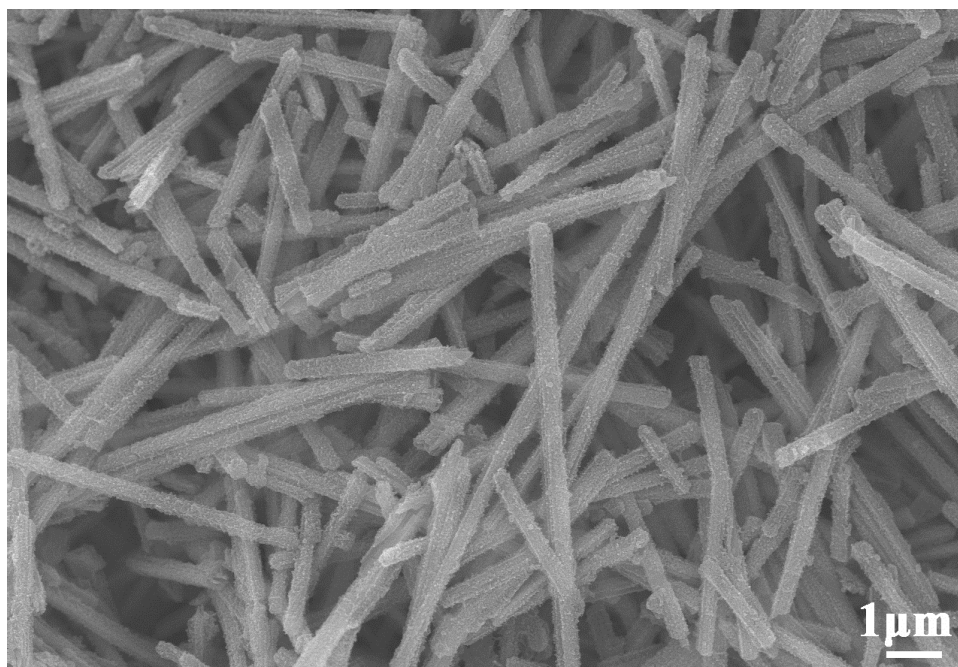**Figure S1.** SEM images of MoO<sub>3</sub>/PANI composite.

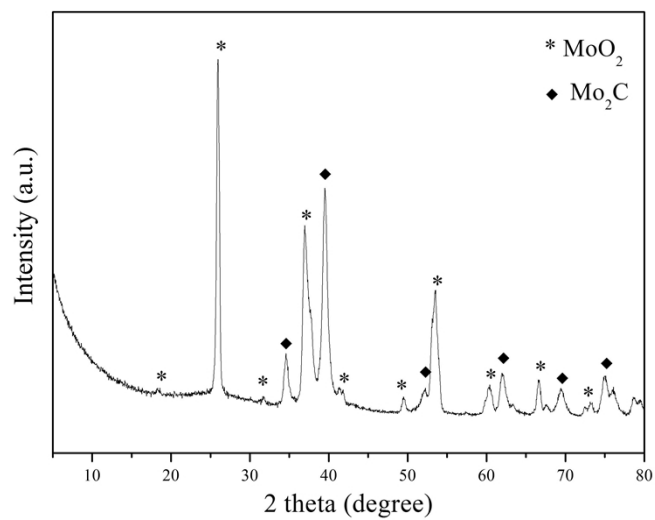

**Figure S2.** XRD pattern of MoO<sub>2</sub>/Mo<sub>2</sub>C-NCNTs.

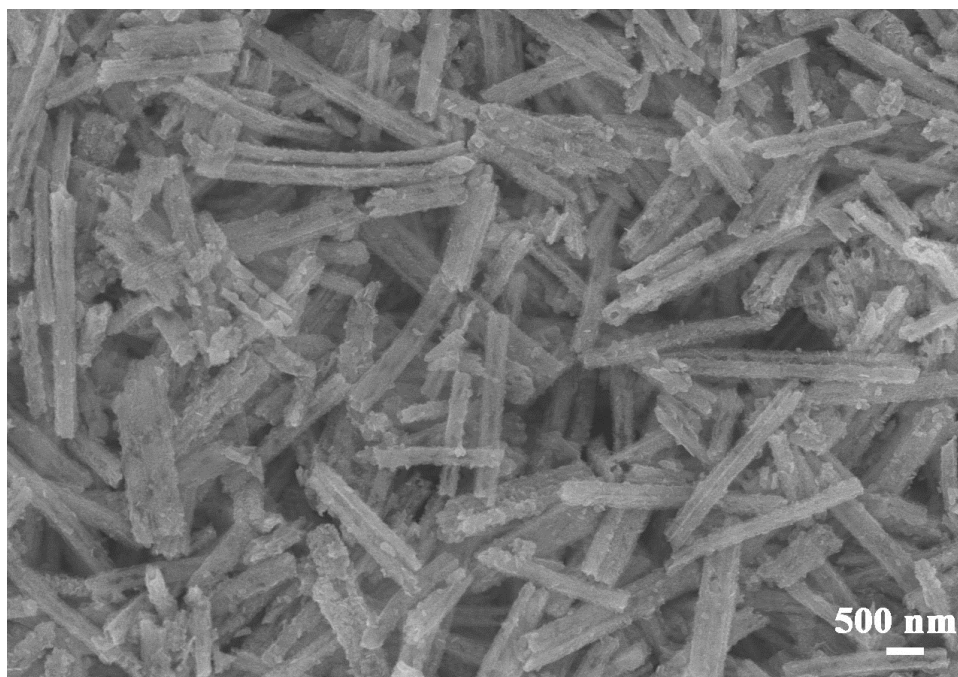

**Figure S3.** SEM image of MoO<sub>2</sub>/Mo<sub>2</sub>C-NCNTs.

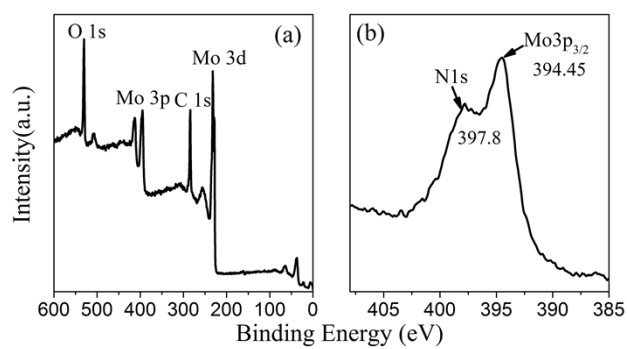

**Figure S4.** XPS spectra of MoO<sub>2</sub>/Mo<sub>2</sub>C-NCNTs. (a) The survey, and (b) N 1s spectra.

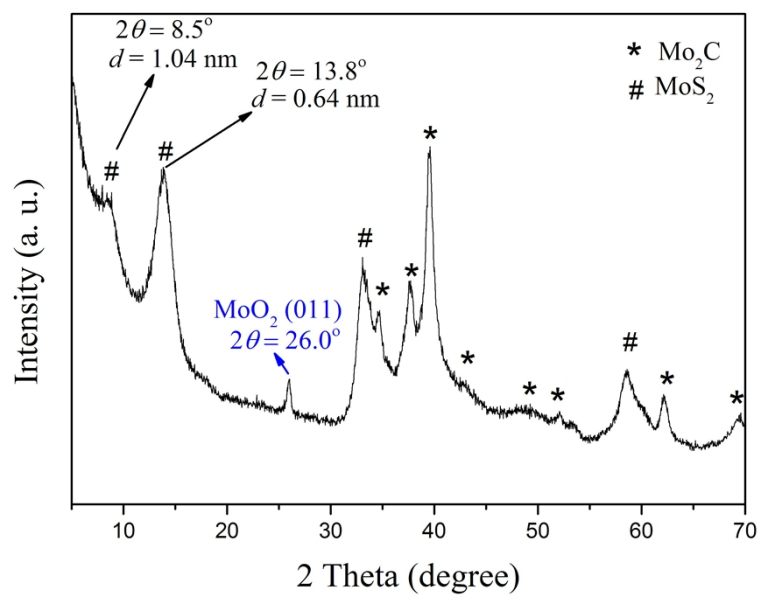

**Figure S5.** XRD pattern of MoS<sub>2</sub>/Mo<sub>2</sub>C-NCNTs.

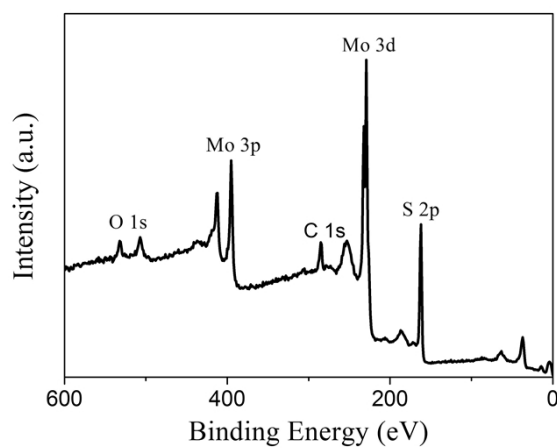

**Figure S6.** The survey XPS spectrum of MoS<sub>2</sub>/Mo<sub>2</sub>C-NCNTs

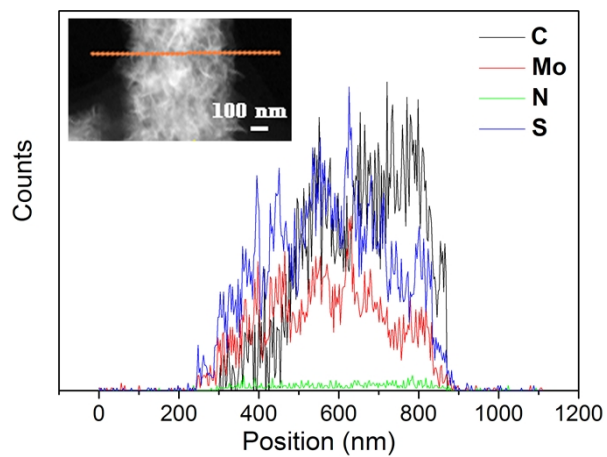

**Figure S7.** EELS spectrum for MoS<sub>2</sub>/Mo<sub>2</sub>C-NCNTs

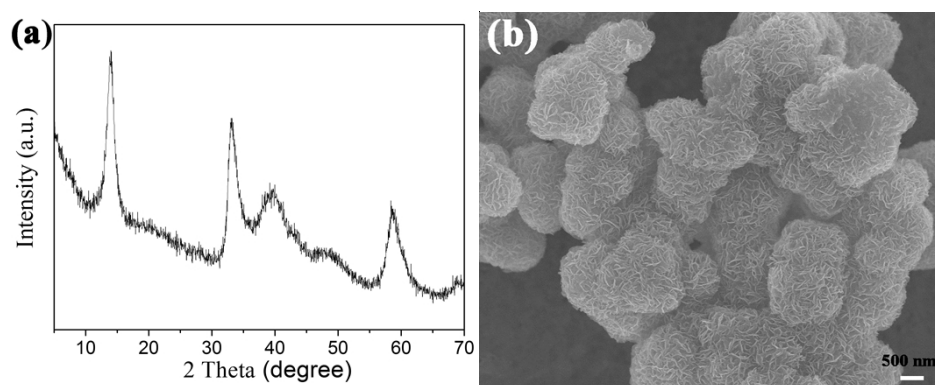

**Figure S8.** (a) XRD and (b) SEM image of MoS<sub>2</sub> nanoflowers.

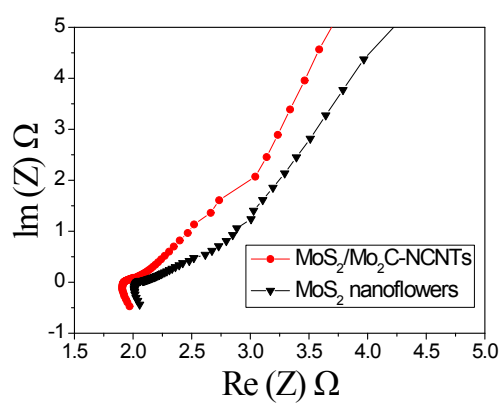

**Figure S9.** EIS spectra of MoS<sub>2</sub>/Mo<sub>2</sub>C-NCNTs and MoS<sub>2</sub> nanoflowers.
